# Supplementary material
Source: bioRxiv or medRxiv preprint supplement (https://medrxiv.org/highwire/filestream/88498/field_highwire_adjunct_files/0/2020.07.01.20105379-1.pdf)
Supplement: Supplementary file [file 2020.07.01.20105379-1.pdf]

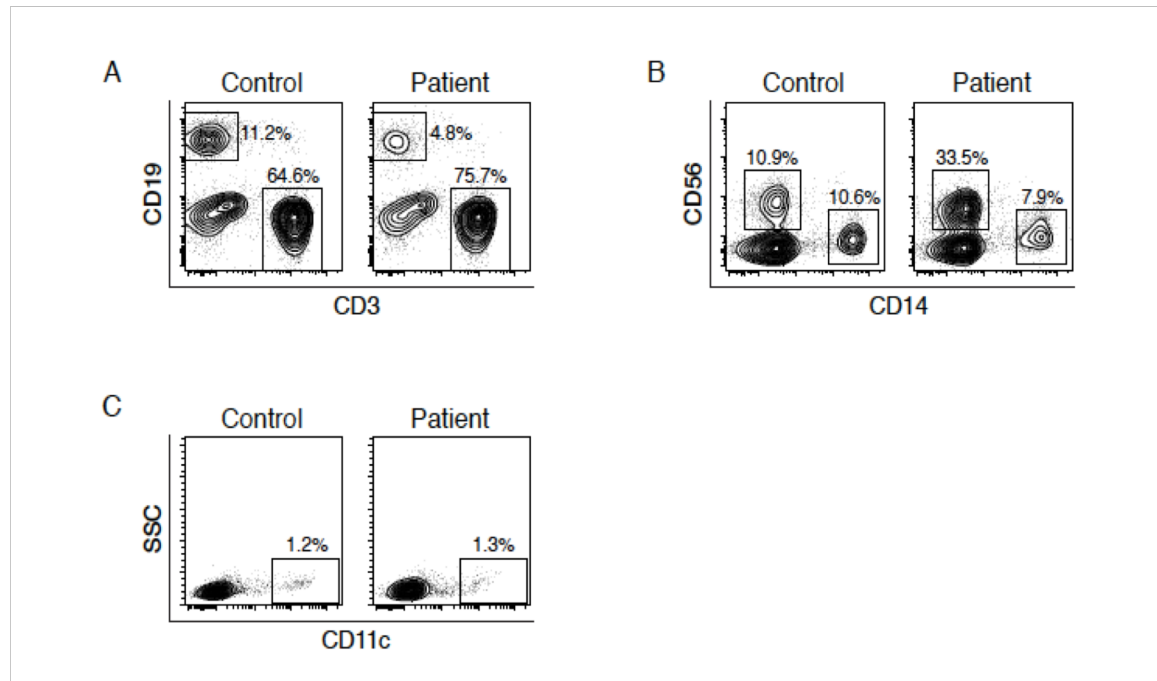

**Figure S2. Phenotype of PBMC used in Figure 1D.** Control and patient PBMC were assayed by FACS. The percentages of **(A)** CD3<sup>+</sup> T cells and CD19<sup>+</sup> B cells, **(B)** CD56<sup>+</sup> NK cells and CD14<sup>+</sup> monocytes, and **(C)** CD14<sup>-</sup>CD56<sup>-</sup>CD11c<sup>+</sup> mDCs are shown.
